# Supplementary material for: Phosphatidylserine-functionalized Fe3O4@SiO2nanoparticles combined with enzyme-encapsulated liposomes for the visual detection of Cu2+
Source: Royal Society of Chemistry journal article supplement (doi:10.1039/c5tb01926e), 2015-12-14
Supplement: c5tb01926e1.pdf [file c5tb01926e1.pdf]

**Electronic supplementary information for**

**Phosphatidylserine-functionalized Fe<sub>3</sub>O<sub>4</sub>@SiO<sub>2</sub> nanoparticles combined with  
enzyme encapsulated liposome for the visual detection of Cu<sup>2+</sup>**

Ye He, Mengxue Li, Wenjing Jiang, WeiJuan Yang, Ling Lin, LiangJun Xu, FengFu

Fu\*

Key Lab of Analysis and Detection for Food Safety of Ministry of Education, Fujian  
Provincial Key Lab of Analysis and Detection for Food Safety, College of Chemistry,  
Fuzhou University, Fuzhou, Fujian, 350116, China

---

\* Corresponding author. Tel./Fax: +86-591-22866135; E-mail address: [fengfu@fzu.edu.cn](mailto:fengfu@fzu.edu.cn) (F.-F. Fu).

Table S1: Comparison on the sensitivity among previous visual methods for detecting Cu<sup>2+</sup> and this study.

| Assay method                                                                                                                                             | Visual detection limit                                                                                                                | Ref.       |
|----------------------------------------------------------------------------------------------------------------------------------------------------------|---------------------------------------------------------------------------------------------------------------------------------------|------------|
| Colorimetric recognition of Cu(II) by (2-dimethylaminoethyl)amino appended anthracene-9,10-diones                                                        | About 5 $\mu$ M                                                                                                                       | [1]        |
| Visual method based on azide- and alkyne-functionalized polydiacetylene vesicles                                                                         | 5 $\mu$ M                                                                                                                             | [2]        |
| Visual Detection of Copper(II) by Azide- and Alkyne-Functionalized Gold Nanoparticles Using Click Chemistry                                              | 50 $\mu$ M                                                                                                                            | [3]        |
| Colorimetric Cu <sup>2+</sup> detection with a ligation DNAzyme and nanoparticles                                                                        | 10 $\mu$ M                                                                                                                            | [4]        |
| Visual detection based on phosphatidylserine-functionalized AuNPs                                                                                        | 30 $\mu$ M                                                                                                                            | [5]        |
| Method by combined Fe <sub>3</sub> O <sub>4</sub> NPs-Based Solid Phase Extraction with a Functionalized Gold Nanoparticle Probe                         | About 3.2 nM by using 200 mL sample                                                                                                   | [6]        |
| Method based on spiro rhodamine B lactam derivative (RhBLA)-functionalized Fe <sub>3</sub> O <sub>4</sub> NPs                                            | 50 nM by using 100 mL sample                                                                                                          | [7]        |
| Visual detection based on Phosphatidylserine-functionalized Fe <sub>3</sub> O <sub>4</sub> @SiO <sub>2</sub> nanoparticles and HRP encapsulated liposome | 0.1-0.5 $\mu$ M by using 2 mL sample<br>(the visual detection limit can be further reduced by using a greater volume of water sample) | This study |

References:

- [1] N. Kaur and S. Kumar, *Dalton transactions* 2006, 3766.
- [2] Q.-L. Xu, K. M. Lee, F. Wang and J. Yoon, *J. Mater. Chem.* 2011, 21, 15214.
- [3] Y. Zhou, S.-X. Wang, K. Zhang and X.-Y. Jiang, *Angew. Chem. Int. Ed.* 2008, 120, 7564.
- [4] J.-W. Liu and Yi Lu, *Chem. Commun.* 2007, 4872.
- [5] W.-J. Yang, Y. He, L.-J. Xu, D.-L. Chen, M.-X. Li, H.-Y. Zhang and F.-F. Fu, *J. Mater. Chem. B* 2014, 2, 7765.
- [6] Z.-Q. Tan, J.-F. Liu and G.-B. Jiang, *Nanoscale* 2012, 4, 6735.
- [7] H.-Y. Zhang, X.-X Zeng, D.-L. Chen, Y. Guo, W.-J. Jiang, L.-J. Xu and F.-F. Fu, *RSC Advances* 2015, 5, 45847.
